# Supplementary material for: Computational modeling of lesion dynamics in HER2+ breast cancer: integrating gut microbiota diversity into therapy response prediction
Source: Research Square preprint supplement (doi:10.21203/rs.3.rs-8703071/v1), 2026-02-23
Supplement: Supplementary file 1 [file 4a42b2f9f0b417a344117765.xlsx]

## Sheet: Supplementary Table 1
Supplementary Table 1. Patient data used in this study
ID	BMI	Treatment response	Tumor grade	HER2 (POS: IHC 3+ or 2+ and FISH+)	Estrogen Receptor (POS >= 10%)	Progesteron Receptor (POS >= 10%)	Ki67 (%)	Basal tumor size (diameter mm)	Post treatment tumor size (diameter mm)	p__Firmicutes	p__Bacteroidetes	p__Actinobacteria	p__Verrucomicrobia	p__Tenericutes	p__Proteobacteria	Firmicutes/Bacteroidetes	Shannon index	Simpson index
1	20.4444	pCR	2	POS	POS	POS	20	60	0	3.32936	1.50987	0.120986	0	0.000745745	0.0153536	2.20506	6.83341	0.982459
2	22.5896	pCR	3	POS	POS	POS	30	20	0	3.31166	1.3532	0.140479	0	0	0.155377	2.44728	6.5363	0.976764
3	28.764	pCR	3	POS	POS	POS	50	30	0	2.93132	1.97485	0.0750712	9.3314e-05	0	0.0181496	1.48432	5.0394	0.911683
4	21.4903	pCR	3	POS	POS	POS	70	60	0	3.35184	1.56495	0.00464796	0	0	0.0785588	2.14182	5.12072	0.941734
5	17.1468	pR	2	POS	POS	POS	15	20	4	1.84456	3.07908	0.0225621	8.26451e-05	0	0.0476862	0.599061	5.1758	0.930441
6	24.4444	pR	2	POS	POS	POS	40	20	2	1.51028	3.35589	0.0279676	2.74192e-05	0	0.105482	0.450038	5.26106	0.939848
7	27.5482	pR	2	POS	NEG	NEG	80	42	10	1.5259	2.81251	0.00261835	0	0	0.656133	0.542541	3.58847	0.799299
8	39.0625	pR	2	POS	POS	POS	40	27	5	2.88486	2.02281	0.0681986	0	6.57652e-05	0.0228205	1.42617	5.9582	0.931502
9	22.7583	pCR	2	POS	POS	POS	30	18	0	2.30155	2.09782	0.409178	0.00678042	0	0.183071	1.09712	5.79304	0.961309
10	18.8189	pCR	2	POS	NEG	NEG	30	15	0	3.19148	1.48857	0.156705	0.127031	0	0.0359677	2.14399	6.55886	0.978692
11	21.3599	pR	3	POS	POS	POS	25	25	12	2.72653	2.05202	0.0911829	0.0717794	0	0.0573964	1.3287	6.65651	0.977432
12	28.3039	pCR	3	POS	NEG	NEG	60	35	0	2.79791	1.82952	0.230486	0.0695482	0	0.0717324	1.52931	6.50725	0.969135
13	27.0051	pCR	3	POS	POS	POS	40	25	0	2.67204	1.89984	0.249346	0	0	0.178295	1.40645	5.49633	0.952909
14	19.5312	pCR	2	POS	POS	POS	8	30	0	1.47466	3.42143	0.022704	0	0	0.0793643	0.431008	5.53232	0.948727
15	23.8281	pCR	2	POS	NEG	NEG	70	21	0	2.97757	1.75028	0.212423	3.37448e-05	0	0.0578048	1.7012	5.47727	0.934039
